# Supplementary material
Source: PubMed Central journal article supplement (PMC3625286)
Supplement: 1217795110_pnas.201217795SI.pdf [file 1217795110_pnas.201217795SI.pdf]

# Supporting Information

Pang and Maslov 10.1073/pnas.1217795110

## SI Materials and Methods

**Obtaining the Dependency Network and Occurrence Frequency Data for Linux Packages.** The package dependency network of Linux distribution Ubuntu 11.04 Natty was obtained by first getting a complete list of packages from <http://packages.ubuntu.com/>, and then running the command `apt-rdepends` to find all of the direct and indirect requirements for each package. The resulting network contains 33,473 packages, and 57,667 direct and 2,439,011 total (direct + indirect) dependency relations.

The occurrence frequency data for 192,392 packages on 2,047,796 computers was downloaded from the package popularity contest (popcon) project ([http://popcon.ubuntu.com/by\\_inst](http://popcon.ubuntu.com/by_inst)) (1). Participants of this project installed on their Linux computers tracking software that automatically reports the installation and subsequent use of different packages to the popcon server. We used the first column reporting the number of computers where this package was installed. A total of 189,711 packages were installed on at least one computer. Other columns not used in this study report the number of computers where this package was or was not used in the past month and the number of computers where it was recently updated.

The popcon project obtained the package data from Ubuntu Linux of a wide range of versions and CPU architectures, whose package repertoire and dependencies are a little bit different from each other. In the analysis we assumed that all participants are using Ubuntu 11.04 with x86 architecture, and based on this version of the Ubuntu Linux we calculated the direct and total dependency degree ( $k_{dep}$  and  $K_{dep}$ ) of every package, and plotted the  $f$  vs.  $K_{dep}$  in Fig. 2. The packages not included in the official repositories of Ubuntu 11.04 or having zero installation frequency were ignored. Packages that are not required by any other packages (i.e., those with  $K_{dep} = 0$ ) were also ignored.

**Construction of Dependency Matrices for the Metabolic Network.** The Kyoto Encyclopedia of Genes and Genomes Database (KEGG) (2) contains the data of metabolic reactions present in different organisms, and the universal metabolic network used in this study is the union of all of the reactions in KEGG consisting of 5,759 reactions and 4,785 metabolites. The group of five common metabolites present in the majority of organisms was selected as the core:  $H_2O$ , ATP,  $NAD^+$ , oxygen, and CoA. The final version of the dependency network used in our study contains 1,832 reactions (or associated enzymes) connected to each other by 3,118 direct and 49,168 direct + indirect dependencies.

The goal of the metabolic network is to either convert nutrients taken up from the environment into core metabolites (catabolism), or to convert core metabolites into the constituents of the biomass and other essential ingredients (anabolism). The direction of the dependency network connecting metabolic reactions would be opposite in these two cases. For simplicity we will concentrate on the case of anabolic pathways below. For catabolic pathways we simply inverted the direction of reactions and then applied the procedure used for anabolic pathways.

To determine the set of other enzymes an enzyme  $i$  in an anabolic pathway depends on for its operation, we performed the following computational analysis. We selected all metabolic substrates of the enzyme  $i$  one by one, and for each of them we constructed the minimal pathway necessary to synthesize this metabolite from our predetermined set of 40 core metabolites. The union of all enzymes in these pathways constructed for each of the substrates of the enzyme  $i$  is a good approximation to the minimal set of enzymes necessary to enable the reaction catalyzed by the enzyme  $i$ ;

as such, we can plausibly assume that the enzymes in this union form the total downstream dependency set for the enzyme  $i$ .

Furthermore, by analogy to software dependency networks, the direct dependency neighbors of the enzyme  $i$  are made by the set of enzymes added at the last layer of our breadth-first search algorithm. Based on this definition, the direct dependency degree of an anabolic enzyme is closely related to the number of metabolic reactions using at least one of its products, which is one of the standard topological definitions of degree in metabolic networks (3). Therefore, the power-law distribution with the exponent  $-2$  we measured for direct dependency degrees is closely related to previously reported scale-free topology on metabolic networks (3).

The rules by which this minimal pathway was constructed were previously described in ref. 4. For the sake of completeness, we included them in the text below.

By repeating the above procedure for all anabolic (catabolic) enzymes located downstream (upstream) from our core metabolites and thus reachable from the core by the scope expansion algorithm (5), we constructed our best approximation to the total dependency network of metabolic enzymes in the KEGG database.

## Rules of Addition of Anabolic Pathways in Dependency Network Calculation.

- i) At the beginning of the simulation, the model organism starts with a “seed” metabolic network consisting of 5 metabolites including  $H_2O$ , ATP,  $NAD^+$ , oxygen, and CoA. It is assumed that our organism is able to generate all of these metabolites by some unspecified catabolic pathways.
- ii) At each step, a new metabolite that cannot yet be synthesized by the organism is randomly selected from the scope (5) of our seed metabolites. This scope consists of all metabolites that in principle could be synthesized from the seed metabolites using all reactions listed in the KEGG database (5).
- iii) To search for the minimal pathway that converts core metabolites to this target we first perform the scope expansion (5) of the core until it first reaches the target. In the course of this expansion, reactions and metabolites are added step by step (or layer by layer). Each layer consists of all KEGG reactions that have all their substrates among the metabolites in the current metabolic core of the organism (light blue area in figure 4 of ref. 5) and those generated by reactions in all of the previous layers (see figure 4 of ref. 5 for an illustration).

**Mathematical Derivation of the Total Dependency Degree Distribution in the Random Model with  $D = 2$ .** To mathematically derive the distribution of dependency degree  $K_{dep}$  in the simple model proposed in this study, we study its dependence on the time,  $t$ , a package was added to the growing dependency network. Here, time  $t$  is defined as the size of the network when a package was added and may have a nonlinear but monotonic relation to the actual time of addition (e.g., in exponentially expanding systems).  $K_{dep}(t)$  can be calculated self-consistently from the following equation:

$$K_{dep}(t) = 1 + \sum_{t'=1}^N K_{dep}(t') D/t'. \quad [S1]$$

Indeed, the total dependency degree of a package added at time  $t$  is given by the sum of total dependency degrees of packages added at later times,  $t'$ , that directly depend on it.  $K_{dep}$  counts both direct and indirect dependencies, and thus indirect



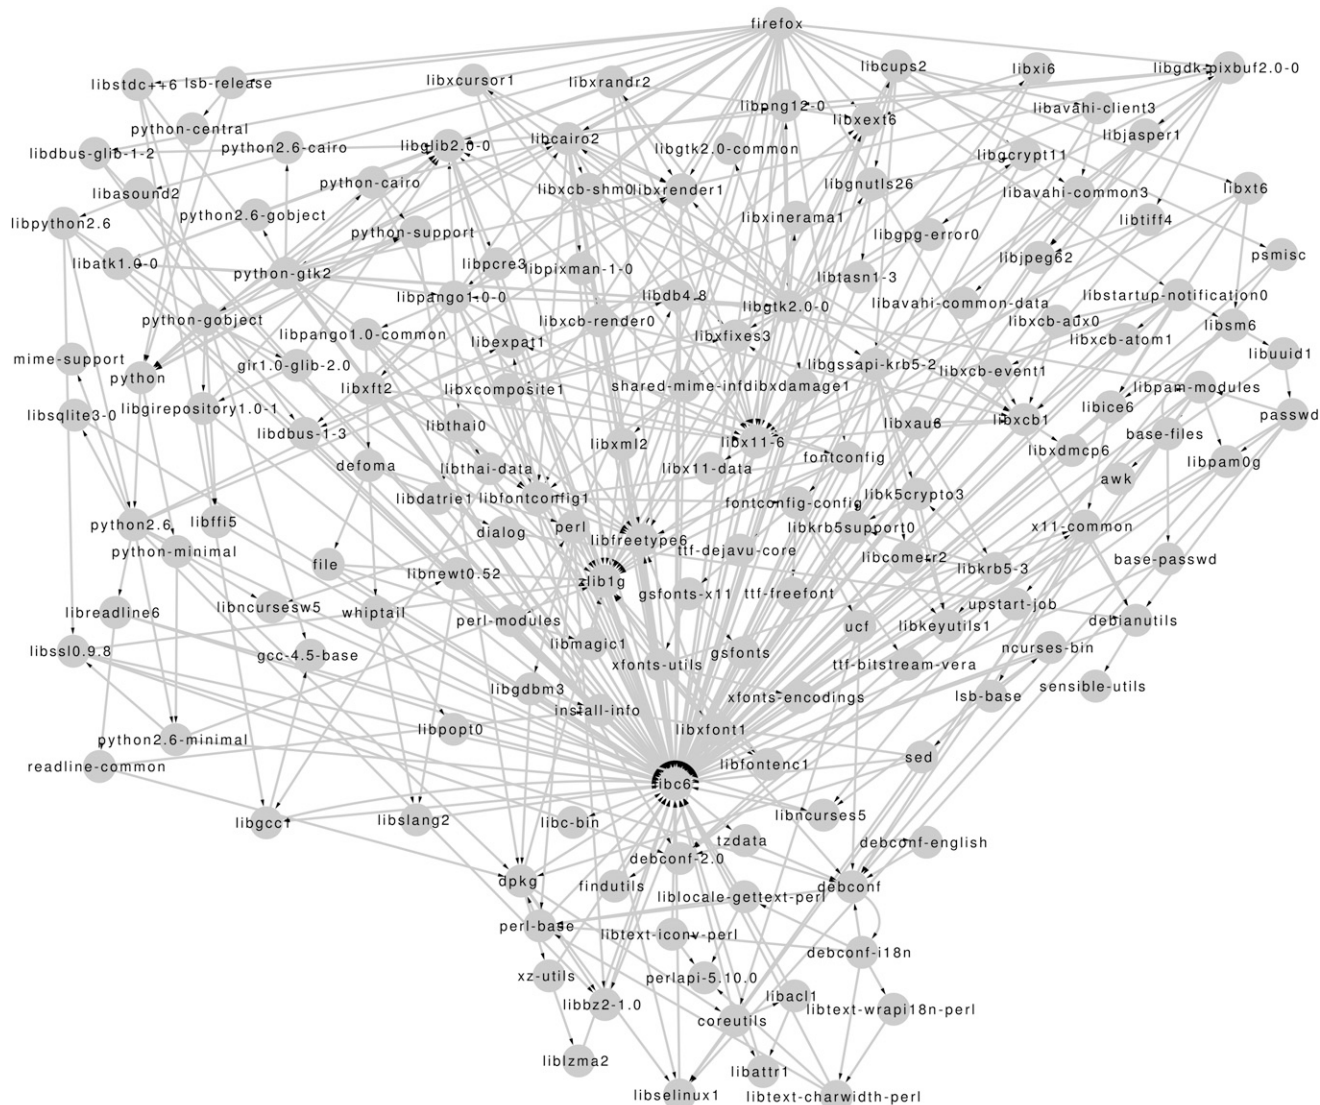

**Fig. S1.** Pathway diagram created with Cytoscape (1) showing 153 Linux packages directly or indirectly required for installation of the package Firefox (the top node).

1. Shannon P, et al. (2003) Cytoscape: A software environment for integrated models of biomolecular interaction networks. *Genome Res* 13(11):2498–2504.

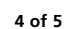

1. Shannon P, et al. (2003) Cytoscape: A software environment for integrated models of biomolecular interaction networks. *Genome Res* 13(11):2498–2504.

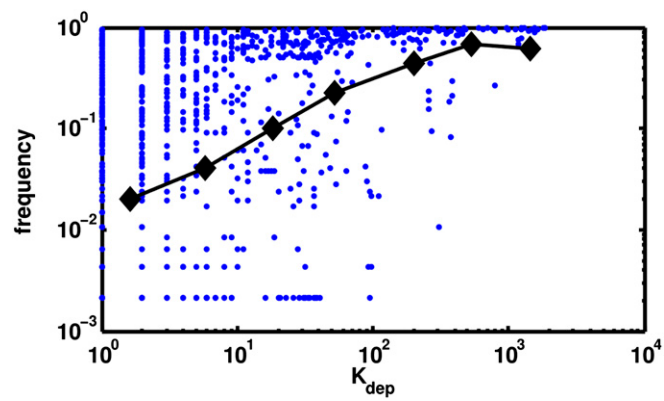

**Fig. S3.** The frequency of occurrence  $f$  (y axis) vs. the total (direct + indirect) dependency degree of metabolites  $K_{dep}$ . The two quantities are positively correlated (Spearman's  $r_s = 0.45$ ). The black curve and symbols shows the average  $f$  in the logarithmic bins of  $K_{dep}$ .
